# Supplementary material
Source: PubMed Central journal article supplement (PMC2838724)
Supplement: NIHMS181056-supplement-Supp1.pdf [file NIHMS181056-supplement-Supp1.pdf]

## SUPPLEMENTAL MATERIALS

### Supplemental Methods

#### *Bone-marrow transplantation (BMT)*

Donor mice were strain- and age-matched to recipient mice aged 6-8 weeks. The BMT procedure was performed as described previously<sup>1,2</sup> with minor modifications. Briefly, the BM in recipient mice was ablated with lethal irradiation (12 Gy), then mice were transplanted with  $5 \times 10^5$  donor BM cells, and the transplanted BM was allowed to regenerate for 4-6 weeks before subsequent experimental procedures were performed. ApoE<sup>-/-</sup> mice were fed a 1% cholesterol-containing Western diet after transplantation to maintain elevated serum cholesterol levels.

#### *Incorporation of infused EPCs*

The incorporation of systemically infused ApoE<sup>-/-</sup> and WT EPCs was evaluated in both ApoE<sup>-/-</sup> mice and WT mice. The infused EPCs were cultured from mouse BM,<sup>1,2</sup> and EPC transfusion was performed as described previously.<sup>3</sup> Briefly, mice were splenectomized to prevent homing of the transfused EPCs to the spleen. Seven days later, the carotid denudation procedure was performed, and  $1 \times 10^6$  Dil-acLDL-labeled EPCs were injected into the tail vein. Mice were sacrificed 14 days after carotid denudation, and carotid arteries were harvested for *en face* histological assessments. Transfused EPCs were visualized with fluorescent microscopy as described previously.<sup>3</sup>

### *Re-endothelialization*

Re-endothelialization was evaluated as described previously<sup>4,5</sup>; assessments were performed in 1) ApoE<sup>-/-</sup> and WT mice, 2) ApoE<sup>-/-</sup> mice transplanted with BM from ApoE<sup>-/-</sup> or WT donor mice, 3) WT mice transplanted with BM from ApoE<sup>-/-</sup> or WT donor mice, and 4) WT mice transplanted with BM from Tie2-Cre Notch1<sup>+/-</sup> or Tie2-Cre donor mice. Briefly, Evans blue dye (Sigma-Aldrich Co., St. Louis, MO, USA) diluted with saline (5%) was injected into the heart, the heart was perfused with saline to wash out the whole blood and excess dye, then the stain was fixed via perfusion of 4% paraformaldehyde (PFA) in phosphate-buffered saline (PBS). Ten minutes after PFA perfusion, mice were sacrificed, and carotid arteries were harvested for *en face* histological assessments; regions of damaged endothelium incorporate the stain and appear blue whereas re-endothelialized tissue is resistant to the dye. The areas stained blue and the unstained areas were outlined and measured with Image J software.

### *Cellular contributions to atherosclerotic lesion formation*

The formation of atherosclerotic lesions was studied in ApoE<sup>-/-</sup> and WT mice transplanted with BM from Tie2-LacZ donor mice. Mice were sacrificed 2, 4, and 6 weeks after carotid artery denudation, then carotid arteries were harvested, paraffin embedded, and sectioned. Lesion formation was visualized with Masson's trichrome staining, then the intima/media ratio was calculated and reported as a percentage. Evidence of apoptosis and  $\beta$ -galactosidase ( $\beta$ -gal) expression (signaling the presence of BM-derived endothelial cells) or apoptosis and CD68 expression (signaling the presence of monocytes/macrophages) was evaluated via double immunofluorescent

staining. Sections were stained for apoptosis by using a fluorescein *in situ* cell-death detection kit (F. Hoffmann-La Roche Ltd, Basel, Switzerland) according to the manufacturer's instructions.  $\beta$ -gal expression was visualized by overnight incubation with rabbit polyclonal anti- $\beta$ -gal antibody (1:1000, Cappel Laboratories Inc., Cochranville, PA, USA) at 4°C followed by a 30-minute incubation with Cy3-goat anti-rabbit IgG antibody (1:2000, Jackson ImmunoResearch Laboratories Inc., West Grove, PA, USA). CD68 expression was visualized by overnight incubation with anti-CD68 antibody (1:100) (AbD Serotec, Oxford, UK) at 4°C followed by a 30-minute incubation with Cy3-rabbit anti-rat IgG antibody (1:500, Jackson ImmunoResearch Laboratories Inc.). Nuclei were counterstained with DAPI (1:5000, Sigma-Aldrich, Co.), then sections were mounted in aqueous mounting medium, and images were examined under a fluorescent microscope (Nikon ECLIPSE TE200, Nikon Inc., Melville, NY, USA).

#### *EPC function (proliferation, adhesion, and migration) and apoptosis*

EPC functional assays were performed with EPCs isolated from the BM of ApoE<sup>-/-</sup> mice, WT mice, Tie2-Cre mice, and Tie2-Cre Notch1<sup>+/-</sup> mice. The effect of cholesterol on EPC function was determined by repeating the assays in the presence of 0, 50, 150, 300, and/or 500 mg/dL cholesterol (Sigma-Aldrich Co.).

Proliferation was evaluated by using a colorimetric MTS assay kit (Promega Corporation, Madison, WI, USA) according to the manufacturer's instructions. Cells ( $1 \times 10^4$  cells/well) were seeded on 96-well plates and cultured in 0.5% fetal bovine serum (FBS) for 24 hours, then the culture medium was replaced with 5% FBS/EBM-2

medium supplemented with cholesterol. After 72 hours in culture, proliferation was visualized with MTS dye, and the optical density (OD) at 490-nm wavelength was measured in 8 wells with a plate reader. Proliferation was reported as the mean relative OD (i.e., normalized to the mean OD of WT or Tie2-Cre EPCs in the absence of cholesterol).

Adhesion was evaluated as described previously.<sup>6</sup> Briefly, EPCs ( $2.5 \times 10^4$  cells/well) in 5% FBS/EBM-2 medium supplemented with cholesterol were seeded on 96-well plates precoated with vitronectin, collagen type I, fibronectin, and laminin (Sigma-Aldrich, Co.) and incubated for 1 hour at 37°C under 5% carbon dioxide, then washed 3 times with PBS. The attached cells were fixed and stained with DAPI, then visualized under a fluorescent microscope (10× magnification). The adhered cells were counted in 8 wells, and adhesion activity was reported as the mean number of attached cells.

Migration was evaluated with a modified Boyden's chamber assay as described previously.<sup>2</sup> Briefly, cells suspended in EBM-2 medium supplemented with cholesterol were placed in the upper chamber ( $5 \times 10^4$  cells/chamber), and the lower chamber was filled with medium containing 50 ng/mL recombinant mouse VEGF protein (R&D Systems, Inc., Minneapolis, MN, USA). The chamber was incubated for 16 hours at 37°C under 5% carbon dioxide, then the EPCs that had migrated into the lower chamber were fixed with 2% PFA/PBS for 10 minutes and stained with DAPI. Migrated cells were viewed under a fluorescent microscope (40× magnification) and counted in 4 chambers,

5 HPFs per chamber. Migration activity was reported as the mean number of migrated cells.

Apoptosis was evaluated by the TUNEL method with an *in situ* cell-death detection kit (F. Hoffmann-La Roche Ltd) according to the manufacturer's instructions. Briefly, cells ( $1 \times 10^5$  cells/well) were seeded on 4-well glass slides and cultured in 0.5% FBS for 24 hours, then the culture medium was replaced with 5% FBS/EBM-2 medium supplemented with cholesterol. After 48 hours in culture, cells were fixed with 2% PFA/PBS, TUNEL stained, and viewed under a fluorescent microscope (20 $\times$  magnification). The number of TUNEL positive cells and the total number of cells were determined in 5 HPFs per well. Apoptosis was reported as the mean percentage of TUNEL-positive cells per HPF.

#### *Quantitative real-time RT-PCR*

EPCs were isolated from the BM of ApoE<sup>-/-</sup> and WT mice and lysed with RNA-Stat (Tel-Test, Inc., Friendswood, TX, USA), then RNA was extracted and reverse transcribed by using an iScript cDNA Synthesis Kit (Bio-Rad Laboratories, Hercules, CA, USA). Amplification was performed with a Taqman 7300 (Applied Biosystems, Foster City, CA, USA) according to the manufacturer's instructions. Primer and probe sequences are indicated below. Relative mRNA expression was calculated with the comparative C<sub>T</sub> method (relative expression =  $2^{\Delta C_T}$ ) and normalized to the expression of the endogenous 18S gene.

VEGF primers: forward, CATCTTCAAGCCGTCCTGTGT; reverse,  
CAGGGCTTCATCGTTACAGCA. VEGF probe: CCGCTGATGCGCTGTGCAGG.  
Endothelial nitric oxide synthase (eNOS) primers: forward,  
TCTGCGGCGATGTCACACTATG; reverse, CATGCCGCCCTCTGTTG. eNOS probe:  
AACCAGCGTCCTGCAAACCGTGC. Notch1 primers: forward,  
CGTGGTCTTCAAGCGTGATG; reverse, GCTCTTCCTCGTGGCCATAG. Notch1  
probe: CAAGGCCAGCAGATGATCTTCCCG.

**Supplemental Table. Serum Cholesterol Levels (mg/dL) \***

| <b>Mouse strain</b> | <b>Before</b> | <b>Time After Arterial Injury (weeks)</b> |            |            |            |
|---------------------|---------------|-------------------------------------------|------------|------------|------------|
|                     | <b>Injury</b> | <b>1</b>                                  | <b>2</b>   | <b>4</b>   | <b>6</b>   |
| WT                  | 51.4±4.4      | 52.8±6.8                                  | 60.2±4.7   | 61.0±3.2   | 56.0±6.7   |
| ApoE <sup>-/-</sup> | 458.0±38.6    | 445.9±30.7                                | 460.9±31.3 | 471.4±23.9 | 431.3±34.4 |

\*Within each mouse strain, cholesterol levels before injury did not differ significantly from the levels observed at subsequent time points.

## Supplemental References

1. Asahara T, Masuda H, Takahashi T, Kalka C, Pastore C, Silver M, Kearne M, Magner M, Isner JM. Bone marrow origin of endothelial progenitor cells responsible for postnatal vasculogenesis in physiological and pathological neovascularization. *Circ Res.* 1999;85:221-228.
2. Asahara T, Takahashi T, Masuda H, Kalka C, Chen D, Iwaguro H, Inai Y, Silver M, Isner JM. VEGF contributes to postnatal neovascularization by mobilizing bone marrow-derived endothelial progenitor cells. *Embo J.* 1999;18:3964-3972.
3. Li M, Takenaka H, Asai J, Ibusuki K, Mizukami Y, Maruyama K, Yoon YS, Wecker A, Luedemann C, Eaton E, Silver M, Thorne T, Losordo DW. Endothelial progenitor thrombospondin-1 mediates diabetes-induced delay in reendothelialization following arterial injury. *Circ Res.* 2006;98:697-704.
4. Goukassian DA, Kishore R, Krasinski K, Dolan C, Luedemann C, Yoon YS, Kearney M, Hanley A, Ma H, Asahara T, Isner JM, Losordo DW. Engineering the response to vascular injury: divergent effects of deregulated E2F1 expression on vascular smooth muscle cells and endothelial cells result in endothelial recovery and inhibition of neointimal growth. *Circ Res.* 2003;93:162-169.
5. Lindner V, Fingerle J, Reidy MA. Mouse model of arterial injury. *Circ Res.* 1993;73:792-796.
6. Walter DH, Rittig K, Bahlmann FH, Kirchmair R, Silver M, Murayama T, Nishimura H, Losordo DW, Asahara T, Isner JM. Statin therapy accelerates reendothelialization: a novel effect involving mobilization and incorporation of



bone marrow-derived endothelial progenitor cells. *Circulation*. 2002;105:3017-3024.
